# Supplementary material for: Improved OSIRIS NO 2 retrieval algorithm: description and validation
Source: Copernicus journal article supplement (doi:10.5194/amt-10-1155-2017), 2017-03-21
Supplement: Supplementary file 1 [file amt-10-1155-2017-supplement.zip]

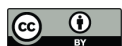

## *Supplement of*

# **Improved OSIRIS NO<sub>2</sub> retrieval algorithm: description and validation**

**C. E. Sioris et al.**

*Correspondence to:* Christopher E. Sioris ([christopher.sioris@canada.ca](mailto:christopher.sioris@canada.ca))

- [amt-10-1155-2017-supplement-title-page.pdf](#)
- [Supplementary\\_material.docx](#)
- [supplementary\\_Sioris\\_et\\_al\\_AMT16.xlsx](#)

The copyright of individual parts of the supplement might differ from the CC-BY 3.0 licence.
