# Supplementary material for: Improved OSIRIS NO 2 retrieval algorithm: description and validation
Source: Copernicus journal article supplement (doi:10.5194/amt-10-1155-2017), 2017-03-21
Supplement: Supplementary file 1 [file Supplementary_material.docx]

The supplement to this paper is a Microsoft Excel file and is described here.

Individual NO2 number density profiles retrieved using the OSIRIS algorithms (v3.0, fast, and the new 1D retrieval) are made available for the purpose of examining the agreement with balloon correlative data for individual coincidences. NO2 number density is reported in units of molec/cm3.

The OSIRIS NO2 profiles have already been scaled to the local time of the balloon measurements.

The Excel file contains two sheets. The first sheet (‘S1’) provides a list of all available balloon measurements and the OSIRIS scan number if coincident. The balloon measurements are sorted by latitude and season. Columns P-Q provide the OSIRIS solar zenith angle (in degrees).

The second sheet (‘S2’) contains the following three header rows:

1. OSIRIS scan number
2. Balloon name
3. Date

Below the header rows, the leftmost column contains the coincident altitude (km) levels. The first block contains the balloon data, followed by OSIRIS v3.0, 1D, and fast products (see main body of paper for details). At the top left corner of each OSIRIS product blocks, the name of the product is specified and the header row containing the scan numbers is repeated for convenience.
