# Supplementary material for: Improved OSIRIS NO 2 retrieval algorithm: description and validation
Source: Copernicus journal article supplement (doi:10.5194/amt-10-1155-2017), 2017-03-21
Supplement: Supplementary file 3 [file supplementary_Sioris_et_al_AMT16.xlsx]

## Sheet: S2
scan	11212010	11219005	11040007	46384006	7994016	7993016	11421015	11422015	11323008	16793009	46579008	46593006	11323008	11323008	11323008	16793009	16793009	16793009	46578009	46579008	46593006	46115006	11457008	8753021	8753020	8790003	8746004	8746004	35875021	35890013	57731022	57745014	6653021	6654020	17943020	17943020	19097011	19097011	14007021	23589023	10834055	10834055	16011044	16011044	25783026	60346020
sensor	SAOZ_asc	SAOZ_SS	LPMA	SALOMON-N2	SAOZ_SS	SAOZ_asc	SAOZ_asc	SAOZ_SS	LPMA	LPMA	LPMA	LPMA	DOAS_asc	DOAS_SS	miniDOAS	DOAS_asc	DOAS_SS	miniDOAS	DOAS_asc	DOAS_SS	DOAS	SPIRALE	MkIV	SPIRALE_asc	SPIRALE_desc	SAOZ	SAOZ_SS	SAOZ_asc	MkIV	MkIV	MkIV	MkIV	SAOZ_asc	SAOZ_SS	SAOZ_asc	SAOZ-BrO_SS	SAOZ_BrOasc	SAOZ_SS	MkIV	SPIRALE	SAOZ_desc	SAOZ_SR	SAOZ_SS	SAOZ_asc	SAOZ	mini-SAOZ
DD/MM/YY	2003-03-16	2003-03-16	2003-03-04	2009-08-25	2002-08-12	2002-08-12	2003-03-30	2003-03-30	2003-03-23	2004-03-24	2009-09-07	2009-09-08	2003-03-23	2003-03-23	2003-03-23	2004-03-24	2004-03-24	2004-03-24	2009-09-07	2009-09-07	2009-09-08	2009-08-07	2003-04-01	2002-10-02	2002-10-02	2002-10-04	2002-10-01	2002-10-01	2007-09-22	2007-09-23	2011-09-23	2011-09-24	2002-05-14	2002-05-14	2004-06-09	2004-06-09	2004-08-25	2004-08-25	2003-09-19	2005-06-22	2003-02-18	2003-02-18	2004-01-31	2004-01-31	2005-11-16	2012-03-16
12	160000000				1010000000	820000000	620000000	690000000	1.107e+07	1.8814e+07			337430700	247907000	340000000	345534000	2.4736e+08	306000000					327151872			1010000000	1140000000						10000000						1100000000							344000000
13	240000000				1290000000	470000000	680000000	490000000	2.91002e+07	3.05421e+07			4.24102e+08	429498000	338000000	367775000	3.64099e+08	338000000					323669520			840000000	870000000	490000000					220000000	1360000000					1050000000							129000000
14	210000000	390000000			1040000000	790000000	630000000	560000000	5.09727e+07	5.13437e+07	536300000		4.807e+08	606556000	384000000	393393000	4.88661e+08	427000000	97820000				392649120			860000000	630000000	180000000					600000000	1100000000			15201000		808000000							127000000
15	200000000	370000000		1059396900	1220000000	690000000	510000000	430000000	8.31809e+07	7.98054e+07	727300000		493755426	724023000	404000000	417271000	621166931	516000000	252800000				343822500			740000000	800000000	550000000					540000000	820000000			676330000		622000000							178000000
16	200000000	420000000		1127681500	1400000000	860000000	660000000	600000000	1.18146e+08	1.15868e+08	1047000000		4.40409e+08	749861000	364000000	372835000	640156662	581500000	333600000		573800000		315575870	282000000	100000000	910000000	830000000	760000000	1130000000	1024716870	832000000		720000000	980000000	1299024000	1700000000	1292030000		632000000		110803000	370000000	350000000	682170000		230000000
17	260000000	490000000		1198235300	1450000000	1130000000	610000000	610000000	1.58081e+08	1.53322e+08	1281000000		3.95373e+08	667691000	282000000	341371000	5.73128e+08	647000000	545250000	1021850000	789250000		350006800	335000000	273000000	920000000	1030000000	880000000	1260000000	1159387080	784000000		740000000	1110000000	1822282000	1860000000	1106639000		792000000		462540000	490000000	470000000	920802000		312000000
18	400000000	480000000		1239433500	1920000000	1370000000	720000000	720000000	1.95524e+08	2.01586e+08	1476000000	50820000	4.39081e+08	605919000	302500000	375243000	5.07537e+08	706500000	1001450000	1975500000	1035350000	1.04222e+09	410884830	433000000	390000000	1190000000	1110000000	1020000000	1220000000	1196550560	841000000		1130000000	1070000000	1.73515e+09	1890000000	1097460000		1030000000		688691000	740000000	440000000	1434975000	570000000	475000000
19	480000000	600000000	597000000	1483222400	2260000000	1600000000	780000000	800000000	2.28264e+08	2.87393e+08	1508000000	459000000	577073356	693510000	603000000	512754000	5.92813e+08	766000000	1159000000	2568000000	1265000000	1.42211e+09	468904320	539000000	472000000	1220000000	1330000000	1210000000	1150000000	1150412760	992000000		670000000	1210000000	1591200000	2060000000	1261946000		1290000000	1.56429e+08	704106000	870000000	930000000	1190181000	450000000	650000000
20	560000000	680000000	777000000	1805394300	2510000000	1870000000	1000000000	820000000	2.62405e+08	4.33428e+08	1531000000	729800000	6.66956e+08	856908000	7.37667e+08	571888000	7.16095e+08	797500000	1511000000	2667500000	1332000000	1.99462e+09	516675250	591000000	553000000	1290000000	1520000000	1440000000	1180000000	1077302240	1160000000	902416140	950000000	1160000000	1.9773e+09	1860000000	1487772000		1490000000	1.49245e+08	725760000	990000000	1140000000	1364440000	490000000	805000000
21	620000000	870000000	885000000	2087376300	2500000000	2070000000	900000000	920000000	3.29581e+08	6.35288e+08	1606000000	906500000	7.64752e+08	915151000	555000000	666758000	7.62697e+08	829000000	1746500000	2661500000	1457000000	2.16859e+09	585343500	710000000	681000000	1520000000	1750000000	1320000000	1350000000	1043279940	1290000000	1026387700	1050000000	1040000000	2040896000	1960000000	1833176000		1640000000	1.73756e+08	830264000	910000000	1420000000	1502655000	570000000	956000000
22	680000000	940000000	941000000	2446671600	2660000000	2360000000	1000000000	1020000000	4.33595e+08	8.55154e+08	1800000000	1089000000	6.81246e+08	1019210000	555000000	561794000	848570667	886500000	1624500000	2780000000	2103000000	2.31488e+09	728833810	921000000	924000000	1770000000	1860000000	1630000000	1640000000	1073365650	1440000000	1133402840	1430000000	1360000000	2159556000	2200000000	1896741000	2040000000	1750000000	2.32385e+08	831530000	840000000	1570000000	1427487000	750000000	1110000000
23	720000000	840000000	952000000	2624290700	2870000000	2510000000	1130000000	1230000000	6.35374e+08	1.05607e+09	1985000000	1287000000	9.56695e+08	1082660000	555000000	825401000	895808126	944000000	1967000000	2971000000	2686500000	2.28926e+09	938782780	1220000000	1180000000	1930000000	1860000000	1700000000	1960000000	1130264460	1690000000	1230022500	1610000000	1500000000	2344280000	2330000000	1.83121e+09	2010000000	1850000000	3.07021e+08	792879000	790000000	1590000000	1836692000	700000000	1330000000
24	780000000	810000000	942000000	2616388100	3090000000	2590000000	1340000000	1370000000	8.13824e+08	1.1965e+09	2138000000	1425000000	1.06123e+09	1172080000	1147500000	890167000	960526086	945500000	2232500000	3255000000	2654000000	2.33957e+09	1121366150	916000000	959000000	1740000000	1920000000	2120000000	2300000000	1207039500	2120000000	1359654800	1950000000	1940000000	2716552000	2460000000	2216032000	2310000000	1980000000	3.01186e+08	807624000	810000000	1730000000	2163516000	780000000	1550000000
25	900000000	940000000	944000000	2528949900	2900000000	2650000000	1330000000	1460000000	9.47644e+08	1.24697e+09	2291000000	1521000000	1347032739	1134550000	1740000000	1135090000	929646900	947000000	2388500000	3342500000	2415500000	2.07528e+09	1262565360	1020000000	1140000000	1650000000	2280000000	2350000000	2610000000	1329743100	2620000000	1523707100	2130000000	2120000000	2903160000	2640000000	2727859000	2640000000	2210000000	395000000	884320000	960000000	1700000000	2.08258e+09	950000000	1700000000
26	980000000	980000000	966000000	2464080700	2780000000	2490000000	1480000000	1480000000	1.03475e+09	1.21515e+09	2437000000	1595000000	1.6816e+09	1431790000	1435000000	1413730000	1159091157	1258500000	2569500000	3312500000	2328000000	2220000000	1410482150	1310000000	1430000000	1620000000	2410000000	2400000000	2860000000	1478185940	2910000000	1641927300	1860000000	1780000000	3.0414e+09	2970000000	2.90018e+09	2800000000	2490000000	440000000	939894000	890000000	1630000000	1998024000	1070000000	1820000000
27	950000000	940000000	989000000	2366709100	2480000000	2500000000	1550000000	1230000000	1.08822e+09	1.12436e+09	2552000000	1734000000	1448456475	1467440000	1130000000	1202110000	1187271207	1570000000	2574500000	3507000000	2354500000	2.2351e+09	1494979200	1440000000	1420000000	1510000000	2320000000		3060000000	1556332320	2960000000	1663067160	1530000000	1440000000	3.33e+09	3100000000	2946666000	2780000000	2640000000	434000000	952336000	870000000	1420000000	1759800000	1050000000	1930000000
28	860000000	870000000	989000000	2235078100	2300000000	2270000000	1560000000	1240000000	1.07605e+09	1.00141e+09	2568000000	1891000000	1643791516	1550220000	1295000000	1358700000	1242560797	1600000000		3485500000	2374000000	1990000000	1453323600	1330000000	1470000000	1340000000	2190000000		3070000000	1573157850	2950000000	1606554920	160000000	320000000	3.28957e+09	2910000000	2898372000	2700000000	2670000000	438000000	1097316000	840000000	1510000000	1713726000	1380000000	2090000000
29	780000000	780000000	950000000	2085176400	2030000000	2120000000	1680000000	1470000000	1.00054e+09	8.48408e+08	2449000000	2003000000	1309008000	1255780000	1460000000	1066860000	1004417664	1630000000		3229500000	2348500000	2040000000	1446349720	1080000000	1350000000	1290000000	2120000000		2960000000	1600366500	2920000000	1505514600			3075696000	2700000000	2803470000	2650000000	2700000000	499000000		950000000	1520000000		1670000000	2330000000
30			873000000	1920737000	1840000000	1920000000			8.78657e+08	7.20946e+08	2216000000	1993000000		1230540000			976975671			2998500000	2184000000	1.88813e+09	1.44007e+09	1270000000	1370000000				2850000000	1575451500	2770000000	1380189160			2662000000	2380000000	2662812000	2340000000	2640000000	7.07784e+08
31			778000000	1659474800						6.52993e+08	1932000000	1833000000		1148950000			909203058			2587000000	1995500000	1725000000	1298895300	1270000000	1340000000				2650000000	1467352950	2540000000	1287486900			2431000000	2110000000	2465136000	2170000000	2470000000	6.57173e+08
32				1382787200						6.47617e+08	1655000000			940038000			7.15467e+08			2237500000		1520000000		1200000000					2370000000	1335138000	2350000000	1248673450					2222976000	1800000000	2290000000	1.1503e+09
33				838113530						6.62479e+08	1412000000									1.96767e+09		1.36125e+09		1120000000					2100000000	1197955700	2120000000	1174945400					1994344000	1660000000	2100000000	1110000000
34																						1190000000							1850000000	1055484300	1790000000	1.03743e+09					1.78591e+09	1310000000	1880000000
35																													1590000000		1460000000	892381200					1515801000	1170000000	1600000000
36																													1310000000		1230000000	753772700						1000000000
37																															1110000000	624703640
38																																5.27519e+08
39
v3.0	11212010	11219005	11040007	46384006	7994016	7993016	11421015	11422015	11323008	16793009	46579008	46593006	11323008	11323008	11323008	16793009	16793009	16793009	46578009	46579008	46593006	46115006	11457008	8753021	8753020	8790003	8746004	8746004	35875021	35890013	57731022	57745014	6653021	6654020	17943020	17943020	19097011	19097011	14007021	23589023	10834055	10834055	16011044	16011044	25783026	60346020
12	215000000				2290000000	1910000000	297000000	297000000	386000000	273000000			386000000	386000000	386000000	273000000	273000000	273000000					348000000			2.46404e+08	330000000						794000000						502000000							361000000
13	270500000				2235000000	1910000000	401500000	401500000	409500000	366500000			409500000	409500000	409500000	366500000	366500000	366500000					393500000			2.22379e+08	324500000	174000000					977000000	1095000000					503000000							327500000
14	326000000	274000000			2180000000	1910000000	506000000	506000000	433000000	460000000	3.52268e+08		433000000	433000000	433000000	460000000	460000000	460000000	366000000				439000000			1.98355e+08	319000000	182000000					1160000000	1120000000			959000000		504000000							294000000
15	368000000	284500000		486500000	2200000000	1965000000	730000000	730000000	537000000	678500000	3.88984e+08		537000000	537000000	537000000	678500000	678500000	678500000	373500000				396500000			263258582	399000000	247500000					1130000000	1160000000			1089500000		649000000							280500000
16	410000000	295000000		469000000	2220000000	2020000000	954000000	954000000	641000000	897000000	425699905		641000000	641000000	641000000	897000000	897000000	897000000	381000000		525000000		354000000	3.83971e+08	3.49669e+08	3.28163e+08	479000000	313000000	427000000	591000000	350000000		1100000000	1200000000	2110000000	2110000000	1220000000		794000000		675000000	675000000	344000000	344000000		267000000
17	495500000	311000000		739500000	2460000000	2265000000	816500000	816500000	741000000	914500000	5.64066e+08		741000000	741000000	741000000	914500000	914500000	914500000	557500000	5.64066e+08	615000000		473500000	5.2622e+08	5.2679e+08	4.553e+08	676500000	473500000	543000000	562500000	504500000		1215000000	1565000000	2340000000	2340000000	1670000000		882000000		754000000	754000000	417000000	417000000		316000000
18	581000000	327000000		1010000000	2700000000	2510000000	679000000	679000000	841000000	932000000	702431236	705000000	841000000	841000000	841000000	932000000	932000000	932000000	734000000	702431236	705000000	568000000	593000000	6.68469e+08	7.03911e+08	5.82437e+08	874000000	634000000	659000000	534000000	659000000		1330000000	1930000000	2570000000	2570000000	2120000000		970000000		833000000	833000000	490000000	490000000	131000000	365000000
19	716000000	446500000	405500000	1280000000	2910000000	2695000000	669500000	669500000	815500000	921500000	9.75467e+08	867500000	815500000	815500000	815500000	921500000	921500000	921500000	892000000	9.75467e+08	867500000	1459000000	622500000	8.82087e+08	7.53653e+08	5.9544e+08	896000000	675500000	772000000	554000000	874500000		1435000000	1775000000	2190000000	2190000000	1930000000		1150000000	1.13515e+08	891000000	891000000	694500000	694500000	217000000	479500000
20	851000000	566000000	438000000	1550000000	3120000000	2880000000	660000000	660000000	790000000	911000000	1248503741	1030000000	790000000	790000000	790000000	911000000	911000000	911000000	1050000000	1248503741	1030000000	2350000000	652000000	1095705740	803396000	6.08442e+08	918000000	717000000	885000000	574000000	1090000000	802000000	1540000000	1620000000	1810000000	1810000000	1740000000		1330000000	1.41459e+08	949000000	949000000	899000000	899000000	303000000	594000000
21	1035500000	903000000	594000000	1775000000	3235000000	2990000000	733500000	733500000	760500000	905000000	1.64843e+09	1225000000	760500000	760500000	760500000	905000000	905000000	905000000	1165000000	1.64843e+09	1225000000	2315000000	718500000	9.75893e+08	1.0103e+09	9.15108e+08	1074000000	858500000	940000000	599500000	1260000000	781000000	1900000000	1750000000	1995000000	1995000000	2000000000		1515000000	1.60012e+08	1074500000	1074500000	1484500000	1484500000	360000000	698000000
22	1220000000	1240000000	750000000	2000000000	3350000000	3100000000	807000000	807000000	731000000	899000000	2048355932	1420000000	731000000	731000000	731000000	899000000	899000000	899000000	1280000000	2048355932	1420000000	2280000000	785000000	8.5608e+08	1217209711	1221773573	1230000000	1000000000	995000000	625000000	1430000000	760000000	2260000000	1880000000	2180000000	2180000000	2260000000	2260000000	1700000000	1.78565e+08	1200000000	1200000000	2070000000	2070000000	417000000	802000000
23	1465000000	1077500000	814500000	2375000000	3660000000	3390000000	1298500000	1298500000	905500000	1144500000	2.2679e+09	1535000000	905500000	905500000	905500000	1144500000	1144500000	1144500000	1630000000	2.2679e+09	1535000000	2405000000	1022500000	9.02917e+08	1473284468	1316551997	1785000000	1480000000	1207500000	892500000	1690000000	802500000	2775000000	2675000000	2360000000	2360000000	2400000000	2400000000	1850000000	2.10159e+08	1140000000	1140000000	2185000000	2185000000	527500000	906000000
24	1710000000	915000000	879000000	2750000000	3970000000	3680000000	1790000000	1790000000	1080000000	1390000000	2487447357	1650000000	1080000000	1080000000	1080000000	1390000000	1390000000	1390000000	1980000000	2487447357	1650000000	2530000000	1260000000	9.49753e+08	1729359225	1411330421	2340000000	1960000000	1420000000	1160000000	1950000000	845000000	3290000000	3470000000	2540000000	2540000000	2540000000	2540000000	2000000000	2.41754e+08	1080000000	1080000000	2300000000	2300000000	638000000	1010000000
25	1680000000	1017500000	931000000	2780000000	3835000000	3550000000	1550000000	1550000000	1325000000	1690000000	2.72656e+09	1905000000	1325000000	1325000000	1325000000	1690000000	1690000000	1690000000	1935000000	2.72656e+09	1905000000	2610000000	1420000000	1.037e+09	1.63447e+09	1427081530	2485000000	2105000000	2125000000	1290000000	2205000000	997500000	3330000000	3660000000	3240000000	3240000000	3010000000	3010000000	2065000000	3.15809e+08	1170000000	1170000000	2050000000	2050000000	811000000	1145000000
26	1650000000	1120000000	983000000	2810000000	3700000000	3420000000	1310000000	1310000000	1570000000	1990000000	2965670464	2160000000	1570000000	1570000000	1570000000	1990000000	1990000000	1990000000	1890000000	2965670464	2160000000	2690000000	1580000000	1124237712	1539588644	1442832639	2630000000	2250000000	2830000000	1420000000	2460000000	1150000000	3370000000	3850000000	3940000000	3940000000	3480000000	3480000000	2130000000	389864372	1260000000	1260000000	1800000000	1800000000	984000000	1280000000
27	1500000000	1095000000	978500000	2805000000	3445000000	3190000000	1510000000	1510000000	1585000000	2165000000	2947037267	2095000000	1585000000	1585000000	1585000000	2165000000	2165000000	2165000000	2010000000	2947037267	2095000000	2655000000	1550000000	1098412536	1637250987	1512820110	2735000000		2755000000	1250000000	2595000000	1255000000	3205000000	3355000000	3610000000	3610000000	3050000000	3050000000	2045000000	4.02565e+08	1365000000	1365000000	1935000000	1935000000	1187000000	1530000000
28	1350000000	1070000000	974000000	2800000000	3190000000	2960000000	1710000000	1710000000	1600000000	2340000000	2928404070	2030000000	1600000000	1600000000	1600000000	2340000000	2340000000	2340000000		2928404070	2030000000	2620000000	1520000000	1072587360	1734913330	1582807581	2840000000		2680000000	1080000000	2730000000	1360000000	3040000000	2860000000	3280000000	3280000000	2620000000	2620000000	1960000000	4.15266e+08	1470000000	1470000000	2070000000	2070000000	1390000000	1780000000
29	1145500000	1115000000	992000000	2660000000	2895000000	2685000000	1680000000	1680000000	1490000000	1815000000	2.56672e+09	2065000000	1490000000	1490000000	1490000000	1815000000	1815000000	1815000000		2.56672e+09	2065000000	2515000000	1645000000	1124925007	1608948741	1454488116	2600000000		2750000000	1365000000	2760000000	1495000000			3100000000	3100000000	2785000000	2785000000	2190000000	4.48589e+08		1500000000	2085000000		1385000000	2140000000
30			1010000000	2520000000	2600000000	2410000000			1380000000	1290000000	2205027097	2100000000		1380000000			1290000000			2205027097	2100000000	2410000000	1770000000	1177262654	1482984152				2820000000	1650000000	2790000000	1630000000			2920000000	2920000000	2950000000	2950000000	2420000000	4.81911e+08
31			1020000000	2300000000						1260000000	2.10576e+09	1975000000		1195000000			1260000000			2.10576e+09	1975000000	2010000000	1480000000	1.07711e+09	1458033470				2545000000	1465000000	2705000000	1485000000			2610000000	2610000000	2655000000	2655000000	2555000000	6.20041e+08
32				2080000000						1230000000	2006498234			1010000000			1230000000			2006498234		1610000000		9.76961e+08					2270000000	1280000000	2620000000	1340000000					2360000000	2360000000	2690000000	7.58172e+08
33				1740000000						969500000	1647177821									1647177821		1435000000		1.00659e+09					1940000000	1220000000	2300000000	1153000000					1855000000	1855000000	2295000000	7.57861e+08
34																						1260000000							1610000000	1160000000	1980000000	966000000					1350000000	1350000000	1900000000
35																													1425000000		1740000000	879000000					1295000000	1295000000	1645000000
36																													1240000000		1500000000	792000000						1240000000
37																															1214500000	738000000
38																																684000000
39
1D	11212010	11219005	11040007	46384006	7994016	7993016	11421015	11422015	11323008	16793009	46579008	46593006	11323008	11323008	11323008	16793009	16793009	16793009	46578009	46579008	46593006	46115006	11457008	8753021	8753020	8790003	8746004	8746004	35875021	35890013	57731022	57745014	6653021	6654020	17943020	17943020	19097011	19097011	14007021	23589023	10834055	10834055	16011044	16011044	25783026	60346020
12	9.86877e+07				2.20889e+09	1.99059e+09	2.81028e+08	1.22299e+08	4.1455e+08	2.29457e+08			4.1455e+08	4.1455e+08	4.1455e+08	2.29457e+08	2.29457e+08	2.29457e+08					2.1796e+08										4.50681e+08						3.00104e+08							2.47478e+08
13	1.40062e+08				2.04316e+09	1.81645e+09	3.54132e+08	1.44779e+08	3.76145e+08	2.57192e+08			3.76145e+08	3.76145e+08	3.76145e+08	2.57192e+08	2.57192e+08	2.57192e+08					2.59299e+08				3.02754e+08	1.61031e+08					5.3502e+08	5.81762e+08					2.65086e+08							2.03427e+08
14	1.65954e+08	2.18274e+08			1.85517e+09	1.67622e+09	4.5536e+08	1.76155e+08	3.64492e+08	3.25744e+08	3.57094e+08		3.64492e+08	3.64492e+08	3.64492e+08	3.25744e+08	3.25744e+08	3.25744e+08	2.77066e+08				2.91202e+08				3.25456e+08	1.86129e+08					6.299e+08	6.60504e+08			9.68171e+08		2.61149e+08							1.78442e+08
15	1.72951e+08	2.73226e+08		5.04848e+08	1.76278e+09	1.59881e+09	5.83717e+08	2.2493e+08	4.12789e+08	4.58689e+08	3.70029e+08		4.12789e+08	4.12789e+08	4.12789e+08	4.58689e+08	4.58689e+08	4.58689e+08	3.23852e+08				3.07953e+08				3.66426e+08	2.24729e+08					7.07892e+08	7.7152e+08			9.61152e+08		3.27383e+08							1.76625e+08
16	2.14629e+08	3.12769e+08		5.70977e+08	1.75528e+09	1.64207e+09	6.48298e+08	3.02833e+08	4.88454e+08	6.19368e+08	4.31368e+08		4.88454e+08	4.88454e+08	4.88454e+08	6.19368e+08	6.19368e+08	6.19368e+08	3.98813e+08		3.91224e+08		3.28644e+08	4.78272e+08	3.46839e+08		4.4007e+08	2.88173e+08	2.31895e+08				7.93162e+08	9.26415e+08	1.36276e+09	1.36276e+09	1.00982e+09		4.53806e+08		5.86191e+08	5.86191e+08				1.88338e+08
17	3.10722e+08	3.31847e+08		7.45098e+08	1.85841e+09	1.78393e+09	6.16861e+08	4.10492e+08	5.45823e+08	7.94096e+08	5.45647e+08		5.45823e+08	5.45823e+08	5.45823e+08	7.94096e+08	7.94096e+08	7.94096e+08	5.21142e+08	5.45647e+08	4.35728e+08		3.76301e+08	5.64904e+08	4.36843e+08		5.54114e+08	3.83579e+08	3.19313e+08				8.87762e+08	1.12683e+09	1.57862e+09	1.57862e+09	1.1277e+09		6.0016e+08		6.37149e+08	6.37149e+08				2.10973e+08
18	4.2999e+08	3.70758e+08		1.02196e+09	2.11397e+09	1.97636e+09	5.71142e+08	5.61871e+08	5.91573e+08	9.10152e+08	7.32541e+08	5.49786e+08	5.91573e+08	5.91573e+08	5.91573e+08	9.10152e+08	9.10152e+08	9.10152e+08	6.62068e+08	7.32541e+08	5.49786e+08		4.62603e+08	6.85498e+08	5.48507e+08		6.86704e+08	4.98091e+08	4.44622e+08				9.93047e+08	1.35999e+09	1.68351e+09	1.68351e+09	1.26616e+09		7.62526e+08		6.92616e+08	6.92616e+08			1.20878e+08	2.56885e+08
19	5.77703e+08	4.83471e+08	3.80777e+08	1.30328e+09	2.47752e+09	2.21919e+09	5.39256e+08	7.08728e+08	6.44961e+08	8.72474e+08	9.83051e+08	7.38344e+08	6.44961e+08	6.44961e+08	6.44961e+08	8.72474e+08	8.72474e+08	8.72474e+08	8.07749e+08	9.83051e+08	7.38344e+08		5.27842e+08	8.4013e+08	6.69794e+08		8.2412e+08	6.22525e+08	5.56075e+08				1.14114e+09	1.48449e+09	1.77045e+09	1.77045e+09	1.41246e+09		9.94856e+08	1.24827e+08	7.81953e+08	7.81953e+08			1.72206e+08	3.60284e+08
20	7.67773e+08	6.80064e+08	4.90867e+08	1.56302e+09	2.86521e+09	2.50476e+09	5.09707e+08	7.69533e+08	7.05999e+08	7.82269e+08	1.26624e+09	9.41485e+08	7.05999e+08	7.05999e+08	7.05999e+08	7.82269e+08	7.82269e+08	7.82269e+08	9.78092e+08	1.26624e+09	9.41485e+08		5.70288e+08	9.50515e+08	7.8606e+08		9.6154e+08	7.5059e+08	6.25894e+08				1.32514e+09	1.48078e+09	1.85776e+09	1.85776e+09	1.59729e+09		1.28539e+09	1.61306e+08	9.07264e+08	9.07264e+08			2.44039e+08	5.1989e+08
21	1.00571e+09	8.53855e+08	6.55107e+08	1.84684e+09	3.24218e+09	2.78138e+09	5.53124e+08	7.8201e+08	7.60342e+08	7.8071e+08	1.55838e+09	1.13027e+09	7.60342e+08	7.60342e+08	7.60342e+08	7.8071e+08	7.8071e+08	7.8071e+08	1.16553e+09	1.55838e+09	1.13027e+09		6.44783e+08	9.16832e+08	9.20774e+08		1.13141e+09	9.07437e+08	7.35748e+08		1.15286e+09		1.6188e+09	1.6237e+09	1.947e+09	1.947e+09	1.78764e+09		1.49521e+09	1.99658e+08	9.80333e+08	9.80333e+08			3.30725e+08	6.69009e+08
22	1.26828e+09	8.84759e+08	7.67696e+08	2.14198e+09	3.64806e+09	3.02626e+09	7.65038e+08	8.12794e+08	8.07181e+08	8.60446e+08	1.83374e+09	1.31453e+09	8.07181e+08	8.07181e+08	8.07181e+08	8.60446e+08	8.60446e+08	8.60446e+08	1.37589e+09	1.83374e+09	1.31453e+09		7.48278e+08	8.12627e+08	1.08194e+09		1.41695e+09	1.15857e+09	9.43336e+08		1.21845e+09		2.076e+09	1.98401e+09	2.15468e+09	2.15468e+09	1.98446e+09	1.98446e+09	1.60711e+09	2.30966e+08	9.74146e+08	9.74146e+08			4.53937e+08	8.20424e+08
23	1.5069e+09	8.59546e+08	8.11761e+08	2.39556e+09	4.05648e+09	3.20889e+09	1.03733e+09	8.87124e+08	9.1722e+08	1.05781e+09	2.09489e+09	1.47639e+09	9.1722e+08	9.1722e+08	9.1722e+08	1.05781e+09	1.05781e+09	1.05781e+09	1.62612e+09	2.09489e+09	1.47639e+09		8.90717e+08	8.30211e+08	1.24379e+09		1.78602e+09	1.4797e+09	1.20905e+09		1.294e+09		2.53625e+09	2.43466e+09	2.46926e+09	2.46926e+09	2.18975e+09	2.18975e+09	1.70905e+09	2.60714e+08	9.60012e+08	9.60012e+08			5.74416e+08	9.54153e+08
24	1.65411e+09	8.9768e+08	8.66112e+08	2.58275e+09	4.2394e+09	3.27396e+09	1.1585e+09	1.14823e+09	1.09767e+09	1.37295e+09	2.35871e+09	1.64283e+09	1.09767e+09	1.09767e+09	1.09767e+09	1.37295e+09	1.37295e+09	1.37295e+09	1.87379e+09	2.35871e+09	1.64283e+09		1.08171e+09	9.54301e+08	1.39629e+09		2.09676e+09	1.75656e+09	1.48648e+09		1.5217e+09		2.92577e+09	2.94777e+09	2.76969e+09	2.76969e+09	2.43058e+09	2.43058e+09	1.80249e+09	2.97627e+08	9.94598e+08	9.94598e+08			6.57731e+08	1.05128e+09
25	1.58264e+09	9.65894e+08	9.07729e+08	2.70548e+09	4.06305e+09	3.24889e+09	1.17828e+09	1.59108e+09	1.2734e+09	1.65781e+09	2.58628e+09	1.81997e+09	1.2734e+09	1.2734e+09	1.2734e+09	1.65781e+09	1.65781e+09	1.65781e+09	1.95388e+09	2.58628e+09	1.81997e+09		1.27618e+09	1.03035e+09	1.54619e+09		2.33293e+09	1.97418e+09	1.80917e+09		1.93165e+09		3.21246e+09	3.33674e+09	2.99995e+09	2.99995e+09	2.76482e+09	2.76482e+09	1.89391e+09	3.42242e+08	1.07143e+09	1.07143e+09			7.3013e+08	1.19611e+09
26	1.37571e+09	1.03411e+09	9.32724e+08	2.72355e+09	3.77567e+09	3.17317e+09	1.29916e+09	1.94918e+09	1.40365e+09	1.84806e+09	2.73067e+09	1.96055e+09	1.40365e+09	1.40365e+09	1.40365e+09	1.84806e+09	1.84806e+09	1.84806e+09	1.85386e+09	2.73067e+09	1.96055e+09		1.42287e+09	1.03042e+09	1.67647e+09		2.48572e+09	2.124e+09	2.21976e+09		2.23287e+09		3.29358e+09	3.36018e+09	3.12045e+09	3.12045e+09	3.06109e+09	3.06109e+09	1.97164e+09	3.58989e+08	1.16747e+09	1.16747e+09			7.88965e+08	1.40092e+09
27	1.27402e+09	1.08915e+09	9.52924e+08	2.64491e+09	3.57527e+09	3.01557e+09	1.48525e+09	2.18744e+09	1.49743e+09	1.94902e+09	2.76372e+09	2.03688e+09	1.49743e+09	1.49743e+09	1.49743e+09	1.94902e+09	1.94902e+09	1.94902e+09	1.86846e+09	2.76372e+09	2.03688e+09		1.53084e+09	1.02973e+09	1.72287e+09		2.54383e+09		2.63549e+09		2.32549e+09		3.06647e+09	3.14896e+09	3.15917e+09	3.15917e+09	3.04838e+09	3.04838e+09	2.04325e+09	3.33974e+08	1.27772e+09	1.27772e+09			8.80313e+08	1.6325e+09
28	1.2335e+09	1.12168e+09	9.41406e+08	2.56406e+09	3.37277e+09	2.80893e+09	1.5852e+09	2.18374e+09	1.55848e+09	1.89922e+09	2.6376e+09	2.06191e+09	1.55848e+09	1.55848e+09	1.55848e+09	1.89922e+09	1.89922e+09	1.89922e+09		2.6376e+09	2.06191e+09		1.61512e+09	1.05841e+09	1.6566e+09		2.54343e+09		2.86516e+09		2.34749e+09		2.54051e+09	2.92049e+09	3.11215e+09	3.11215e+09	2.80419e+09	2.80419e+09	2.14648e+09	3.40589e+08	1.38135e+09	1.38135e+09			1.03644e+09	1.85587e+09
29	1.1582e+09	1.12234e+09	9.62981e+08	2.47353e+09	3.06327e+09	2.57876e+09	1.59258e+09	1.89069e+09	1.55433e+09	1.73331e+09	2.39019e+09	2.03954e+09	1.55433e+09	1.55433e+09	1.55433e+09	1.73331e+09	1.73331e+09	1.73331e+09		2.39019e+09	2.03954e+09		1.62336e+09	1.08771e+09	1.52044e+09		2.45671e+09		2.87273e+09		2.34238e+09				2.97833e+09	2.97833e+09	2.6979e+09	2.6979e+09	2.24192e+09	4.05266e+08		1.41008e+09			1.1903e+09	2.03392e+09
30			1.03713e+09	2.36476e+09	2.69204e+09	2.32963e+09			1.42116e+09	1.57037e+09	2.18592e+09	1.94043e+09		1.42116e+09			1.57037e+09			2.18592e+09	1.94043e+09		1.47742e+09	1.10981e+09	1.3601e+09				2.66586e+09		2.33622e+09				2.7775e+09	2.7775e+09	2.69131e+09	2.69131e+09	2.31096e+09	5.10024e+08
31			9.62507e+08	2.24808e+09						1.41716e+09	2.03228e+09	1.74017e+09		1.19235e+09			1.41716e+09			2.03228e+09	1.74017e+09		1.23782e+09	1.10949e+09	1.19952e+09				2.30964e+09		2.40138e+09				2.38512e+09	2.38512e+09	2.44487e+09	2.44487e+09	2.34306e+09	6.66318e+08
32				1.95922e+09						1.10871e+09	1.85439e+09			1.01107e+09			1.10871e+09			1.85439e+09				1.07349e+09					2.04973e+09		2.44473e+09						2.02159e+09	2.02159e+09	2.27124e+09	7.81139e+08
33				1.5444e+09						7.10937e+08	1.49629e+09									1.49629e+09				1.00856e+09					1.86815e+09		2.29846e+09						1.69554e+09	1.69554e+09	2.0124e+09	7.40514e+08
34																													1.63569e+09		1.98373e+09						1.48109e+09	1.48109e+09	1.64498e+09
35																													1.4502e+09		1.51909e+09						1.19317e+09	1.19317e+09	1.40031e+09
36																													1.32278e+09		1.02878e+09							8.03954e+08
37
38
39
fast	11212010	11219005	11040007	46384006	7994016	7993016	11421015	11422015	11323008	16793009	46579008	46593006	11323008	11323008	11323008	16793009	16793009	16793009	46578009	46579008	46593006	46115006	11457008	8753021	8753020	8790003	8746004	8746004	35875021	35890013	57731022	57745014	6653021	6654020	17943020	17943020	19097011	19097011	14007021	23589023	10834055	10834055	16011044	16011044	25783026	60346020
12	141500000					1495000000	303000000			151500000						151500000	151500000	151500000					211000000
13	180000000				1990000000	1375000000	468000000	219000000	291500000	180500000			291500000	291500000	291500000	180500000	180500000	180500000					243000000				416500000	221500000					637000000	852500000					299500000							329000000
14	224000000	370500000			1855000000	1330000000	634500000	378000000	331000000	252000000	295500000		331000000	331000000	331000000	252000000	252000000	252000000	161000000				264000000				434000000	248000000					638500000	844500000			1115000000		298500000							258000000
15	269500000	367000000		317500000	1800000000	1380000000	753000000	494500000	413000000	390000000	267000000		413000000	413000000	413000000	390000000	390000000	390000000	187000000				269500000				463000000	283500000					669500000	839000000			1045000000		387000000							249000000
16	341500000	356000000		361000000	1820000000	1515000000	774000000	509500000	494000000	504500000	285000000		494000000	494000000	494000000	504500000	504500000	504500000	242500000		276000000		275000000	324500000	344000000		510500000	334000000	446000000		276817846		737500000	868500000	1350000000	1350000000	1050000000		538000000		553500000	553500000				255500000
17	456000000	352500000		479500000	1925000000	1730000000	684500000	525000000	528000000	547000000	345500000		528000000	528000000	528000000	547000000	547000000	547000000	343500000	345500000	325500000		297000000	387000000	436000000		599500000	415000000	596500000		3.57169e+08		852500000	963000000	1515000000	1515000000	1130000000		658000000		644000000	644000000				259000000
18	577000000	378000000		678500000	2150000000	1975000000	603000000	597000000	555000000	579500000	465000000	418500000	555000000	555000000	555000000	579500000	579500000	579500000	470500000	465000000	418500000		341000000	493500000	548500000		716000000	519500000	812000000		478884868		997000000	1110000000	1575000000	1575000000	1230000000		736500000		667000000	667000000			1.42762e+07	293500000
19	696500000	470000000	402500000	943000000	2460000000	2230000000	575500000	682000000	625500000	634000000	673000000	568500000	625500000	625500000	625500000	634000000	634000000	634000000	624500000	673000000	568500000		384500000	666000000	673000000		846500000	639500000	948500000		6.07929e+08		1150000000	1240000000	1660000000	1660000000	1330000000		944000000	1.87975e+08	717000000	717000000			5.78591e+07	436000000
20	826000000	633500000	477000000	1245000000	2765000000	2515000000	565000000	718500000	710000000	697000000	1013500000	759000000	710000000	710000000	710000000	697000000	697000000	697000000	807500000	1013500000	759000000		435500000	838500000	794000000		988000000	771000000	956500000		7.2811e+08		1305000000	1340000000	1830000000	1830000000	1520000000		1305000000	1.99091e+08	830500000	830500000			1.46482e+08	672500000
21	961000000	803000000	578000000	1570000000	3075000000	2785000000	595000000	730500000	732000000	756000000	1430000000	989000000	732000000	732000000	732000000	756000000	756000000	756000000	1006000000	1430000000	989000000		535500000	890000000	925500000		1150000000	924000000	957000000		894114908		1655000000	1580000000	1995000000	1995000000	1800000000		1535000000	2.05075e+08	914500000	914500000			2.34481e+08	783000000
22	1150000000	899000000	651000000	1915000000	3460000000	3020000000	716000000	768500000	721000000	846500000	1805000000	1225000000	721000000	721000000	721000000	846500000	846500000	846500000	1215000000	1805000000	1225000000		701000000	857500000	1069500000		1390000000	1140000000	994000000		1.14308e+09		2310000000	2.035e+09	2060000000	2060000000	2025000000	2025000000	1565000000	2.02032e+08	928500000	928500000			3.22542e+08	773000000
23	1460000000	959000000	690500000	2245000000	3885000000	3220000000	900500000	844000000	867500000	1094500000	2140000000	1425000000	867500000	867500000	867500000	1094500000	1094500000	1094500000	1430000000	2140000000	1425000000		910000000	880000000	1220000000		1695000000	1405000000	1115000000		1466588430		2810000000	2565000000	2095000000	2095000000	2140000000	2140000000	1605000000	1.98554e+08	929500000	929500000			4.49166e+08	882000000
24	1785000000	1053000000	782500000	2535000000	4.14e+09	3355000000	1110000000	1060500000	1190000000	1515000000	2460000000	1610000000	1190000000	1190000000	1190000000	1515000000	1515000000	1515000000	1650000000	2460000000	1610000000		1175000000	948500000	1375000000		1990000000	1665000000	1365000000		1820436868		2955000000	3125000000	2435000000	2435000000	2275000000	2275000000	1710000000	2.21799e+08	966500000	966500000			6.10871e+08	1112500000
25	1890000000	1160000000	915000000	2735000000	4.145e+09	3405000000	1310000000	1420000000	1410000000	1885000000	2705000000	1745000000	1410000000	1410000000	1410000000	1885000000	1885000000	1885000000	1840000000	2705000000	1745000000		1395000000	987500000	1515000000		2280000000	1925000000	1740000000		2177496342		3100000000	3535000000	3065000000	3065000000	2570000000	2570000000	1805000000	2.81218e+08	1035000000	1035000000			7.86566e+08	1335000000
26	1770000000	1265000000	993000000	2785000000	4000000000	3315000000	1455000000	1755000000	1450000000	2130000000	2765000000	1845000000	1450000000	1450000000	1450000000	2130000000	2130000000	2130000000	1960000000	2765000000	1845000000		1445000000	983500000	1615000000		2515000000	2145000000	2225000000		2.44488e+09		3345000000	3540000000	3615000000	3615000000	2890000000	2890000000	1815000000	3.28808e+08	1135000000	1135000000			941588636	1535000000
27	1545000000	1340000000	1005000000	2735000000	3745000000	3110000000	1545000000	2035000000	1520000000	2245000000	2675000000	1985000000	1520000000	1520000000	1520000000	2245000000	2245000000	2245000000	2040000000	2675000000	1985000000		1465000000	1015500000	1650000000		2660000000		2705000000		2.5755e+09		3365000000	3315000000	3680000000	3680000000	3025000000	3025000000	1830000000	3.41799e+08	1260000000	1260000000			1090550449	1740000000
28	1270000000	1345000000	976500000	2720000000	3495000000	2950000000	1625000000	2190000000	1620000000	2065000000	2505000000	2090000000	1620000000	1620000000	1620000000	2065000000	2065000000	2065000000		2505000000	2090000000		1600000000	1130000000	1600000000		2670000000		2860000000		2.62793e+09		2980000000	3080000000	3335000000	3335000000	2995000000	2995000000	2030000000	3.67823e+08	1385000000	1385000000			1.23488e+09	1875000000
29	1053500000	1275000000	1076500000	2745000000	3305000000	2830000000	1695000000	2160000000	1655000000	1735000000	2255000000	2075000000	1655000000	1655000000	1655000000	1735000000	1735000000	1735000000		2255000000	2075000000		1735000000	1235000000	1520000000		2540000000		2690000000		2619482854				3120000000	3120000000	2990000000	2990000000	2295000000	4.27374e+08		1470000000			1.33301e+09	1940000000
30			1370000000	2530000000	3115000000	2690000000			1515000000	1510000000	2140000000	1975000000		1515000000			1510000000			2140000000	1975000000		1645000000	1260000000	1490000000				2475000000		2610556894				3020000000	3020000000	3025000000	3025000000	2430000000	5.23308e+08
31			1305000000	2140000000						1345000000	2135000000	1845000000		1235000000			1345000000			2135000000	1845000000		1380000000	1210000000	1485000000				2230000000		2642771783				2635000000	2635000000	2670000000	2670000000	2435000000	6.80867e+08
32				1840000000						1160000000	2070000000			989000000			1160000000			2070000000				1095000000					2045000000		2.56417e+09						2000000000	2000000000	2315000000	8.25119e+08
33				1590000000						961500000	1780000000									1780000000				953000000					1935000000		2.12823e+09						1610000000	1610000000	1980000000	8.40911e+08
34																													1765000000		1560703480						1540000000	1540000000	1540000000
35																													1600000000		1380585638								1370000000
36																													1465000000		1465550072								1395000000
37
38
39

## Sheet: S1
balloon
high latitude		high latitude		mid-latitude		mid-latitude		tropics
winter		summer		winter		summer									scan	SZA	AM/PM
SAOZ - Mar 16, 2003 asc	11212010	SALOMON-N2 - Aug 25, 2009	46384006	SPIRALE - Oct 2, 2002 asc	8753021	SAOZ - Sep 04, 2002 asc	no coinc	SPIRALE - Jun 22, 2005	23589023						11212010	84.703	AM
SAOZ - Mar 16, 2003 occ	11219005	SAOZ - Aug 12, 2002 occ	7994016	SPIRALE - Oct 2, 2002 desc	8753020	SAOZ - Sep 04, 2002 occ	no coinc	SAOZ - Feb 18, 2003 desc	10834055						11219005	84.2123	PM
LPMA - Mar 04, 2003 SS	11040007	SAOZ - Aug 12, 2002 asc	7993016	SAOZ - Oct 04, 2002 SR	8790003	SAOZ - Sep 03, 2002 desc	no coinc	SAOZ - Feb 18, 2003 occ	10834055						11040007	88.2533	PM
		SAOZ - Mar 30, 2003 asc	11421015	SAOZ - Oct 01, 2002 occ	8746004	SAOZ - Sep 03, 2002 occ	no coinc	SAOZ - Feb 23, 2003 desc	no coinc						46384006	77.6037	PM
		SAOZ - Mar 30, 2003 SS	11422015	SAOZ - Oct 01, 2002 asc	8746004	SAOZ - May 14, 2002 asc	6653021	SAOZ - Feb 23, 2003 occ	no coinc						7994016	69.07	AM
		LPMA - Mar 23, 2003 SS	11323008	SAOZ - Oct 07, 2005 occ	no coinc	SAOZ - May 14, 2002 occ	6654020	SAOZ - Jan 31, 2004 occ	16011044						7993016	68.6	AM
		LPMA - Mar 24, 2004 asc	16793009	SAOZ - Oct 07, 2005 asc	no coinc	SAOZ - Jun 09, 2004 asc	17943020	SAOZ - Jan 31, 2004 asc	16011044						11421015	79	AM
		LPMA - Sep 07, 2009 SS	46579008	LPMA - Oct 09, 2003 asc	no coinc	SAOZ - Jun 09, 2004 occ	17943020	SAOZ - Feb 05, 2004 SS	no coinc						11422015	78.9	AM
		LPMA - Sep 08, 2009 SR	46593006	miniDOAS - Oct 09, 2003 asc	no coinc	SAOZ-BrO Aug 25, 2004 occ	19097011	SAOZ - Nov 16, 2005 asc	25783026						11323008	82.0319	PM
		DOAS - Mar 23, 2003 asc	11323008	DOAS - Oct 09, 2003 asc	no coinc	SAOZ-BrO Aug 25, 2004 asc	19097011	SAOZ - Nov 16, 2005 SS	no coinc						16793009	80.2678	AM
		DOAS - Mar 23, 2003 SS	11323008	MkIV - Sep 23, 2004 SS	no coinc	SAOZ - May 07, 2005 asc	no coinc	SAOZ - Aug 07, 2006 asc	no coinc						46578009	81.3442	PM
		miniDOAS - Mar 23, 2003	11323008	MkIV - Sep 22, 2007 SS	35875021	SAOZ - May 07, 2005 occ	no coinc	SAOZ - Aug 07, 2006 occ	no coinc						46579008	81.6015	PM
		DOAS - Mar 24, 2004 asc	16793009	MkIV - Sep 23, 2007 SR	35890013	MkIV - Sep 19, 2003 SS	14007021	SAOZ - Aug 10, 2006 asc	no coinc						46593006	82.7153	PM
		DOAS - Mar 24, 2004 SS	16793009	MkIV - Sep 23, 2011 SS	57731022	MkIV - Sep 20, 2005 SS	no coinc	SAOZ - Aug 10, 2006 occ	no coinc						46115006	72.08	AM
		miniDOAS - Mar 24, 2004	16793009	MkIV - Sep 24, 2011 SR	57745014	MkIV - Sep 13, 2014 SS	no coinc	SAOZ - Aug 19, 2006 asc	no coinc						11457008	79	PM
		DOAS - Sep 07, 2009 asc	46578009					SAOZ - Aug 19, 2006 occ	no coinc						8753021	84.53	AM
		DOAS - Sep 07, 2009 SS	46579008					SAOZ - Mar 11, 2012 SS	no coinc						8753020	84.5	AM
		DOAS - Sep 08, 2009 SR	46593006					mini-SAOZ Mar 16, 2012 SS	60346020						8790003	90.4574	PM
		SPIRALE - Aug 7, 2009 desc	46115006												8746004	89.4326	PM
		MkIV - Apr 01, 2003 occ	11457008												35875021	73.9	AM
		SALOMON-N2 - Apr 28, 2011	55512010												35890013	74	AM
															57731022	76.0464	AM
															57745014	76.3789	AM
															6653021	71.434	AM
															6654020	70	AM
															17943020	64.3614	AM
															19097011	71.73	AM
															14007021	80.8731	AM
															23589023	86	AM
															10834055	82.2982	PM
															16011044	86.6	PM
															25783026	81.0152	AM
															60346020	86.457	AM
